# Supplementary material for: ExoU Induces Lung Endothelial Cell Damage and Activates Pro-Inflammatory Caspase-1 during Pseudomonas aeruginosa Infection
Source: MDPI journal article supplement (doi:10.3390/toxins14020152), 2022-02-18
Supplement: s1 [file s1]

Supplementary Material

# ExoU Induces Lung Endothelial Cell Damage and Activates Pro-Inflammatory Caspase-1 during *Pseudomonas aeruginosa* Infection

Kierra S. Hardy, Amanda N. Tuckey, Phoibe Renema, Mita Patel, Abu-Bakr Al-Mehdi, Domenico Spadafora, Cody A. Schlumpf, Robert A. Barrington, Mikhail F. Alexeyev, Troy Stevens, Jean-Francois Pittet, Brant M. Wagener, Jon D. Simmons, Diego F. Alvarez and Jonathon P. Audia

## Supplemental Figure 1.

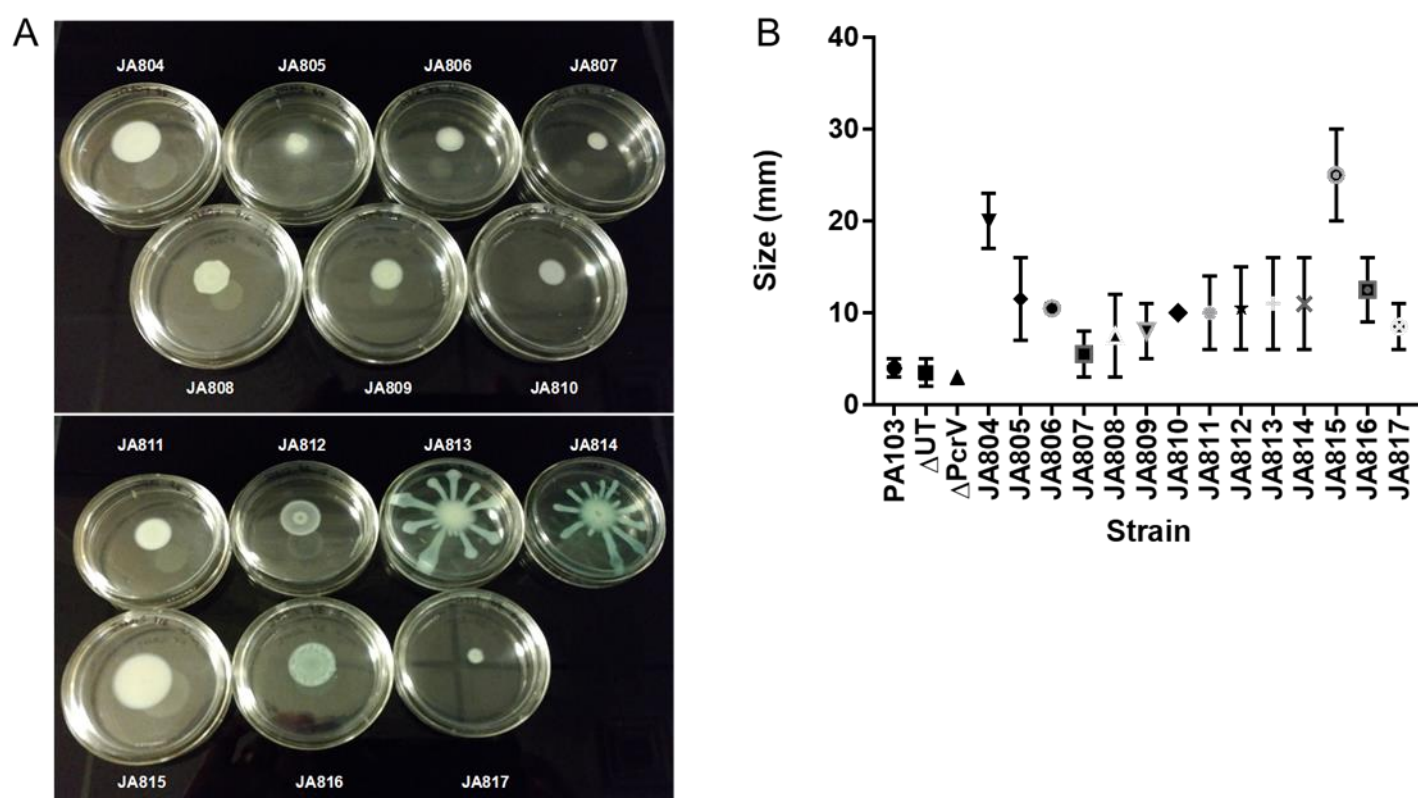

**Figure S1.** Motility assay on the *P. aeruginosa* clinical isolates used in these studies. (A) Images of motility agar plates (representative image). (B) Quantification of the motility data (n = 3 biological replicates).
